# Supplementary material for: Clinical Characteristics of Macrolide-Refractory Mycoplasma pneumoniae Pneumonia in Korean Children: A Multicenter Retrospective Study
Source: MDPI journal article supplement (doi:10.3390/jcm11020306), 2022-01-08
Supplement: s1 [file s1]

## Supplementary material

### Supplementary file S1. The list and IRB approval numbers of all the institution related with this study

1. Seoul National University Hospital Approval No.: H-1702-066-831
2. Chungnam National University Hospital Approval No.: CNUH 2017-04-023
3. Chonnam National University Hospital Approval No.: CNUH-2017-094
4. Samsung Changwon Hospital Approval No.: SCMC 2017-02-001-001
5. Inje University Sanggye Paik Hospital Approval No.: SGPAIK 2015-12-019
6. Ulsan University Gangneung Asan Hospital Approval No.: 2017-06-009
7. Inje University Haeundae Paik Hospital Approval No.: 2018-08-008
8. Soonchunhyang University Seoul Hospital Approval No.: SCHUH201-309013001
9. Dankook University Hospital Approval No.: DKUH 2017-04-021
10. Kangbuk Samsung Hospital Approval No.: 2017-02-036
11. University Guro Hospital Approval No.: KUGH17065-001
12. Eulji University Hospital Approval No.: 2017-03-011
13. Korea Cancer Center Hospital Approval No.: K-1703-002-086
14. Asan Medical Center Approval No.: 2017-0566
15. Pusan National University Yangsan Hospital Approval No.: 05-2017-051
16. National Health Insurance Service Ilsan Hospital Approval No.: 2017-02-009-003
17. Daegu Catholic University of Medical center Approval No.: CR-17-035
18. Dongguk University Kyungju Hospital Approval No.: 110757-201703-HR-03-01
19. CHA Bundang Medical Center Approval No.: 2017-06-006
20. The Catholic University of Korea Uijeongbu St. Mary's Hospital Approval No.: UC17RNMI0021

21. Severance Children's Hospital Approval No.: 4-2017-0166

22. Hallym University Kangnam Sacred Heart Hospital Approval No.:2017-04-007-001

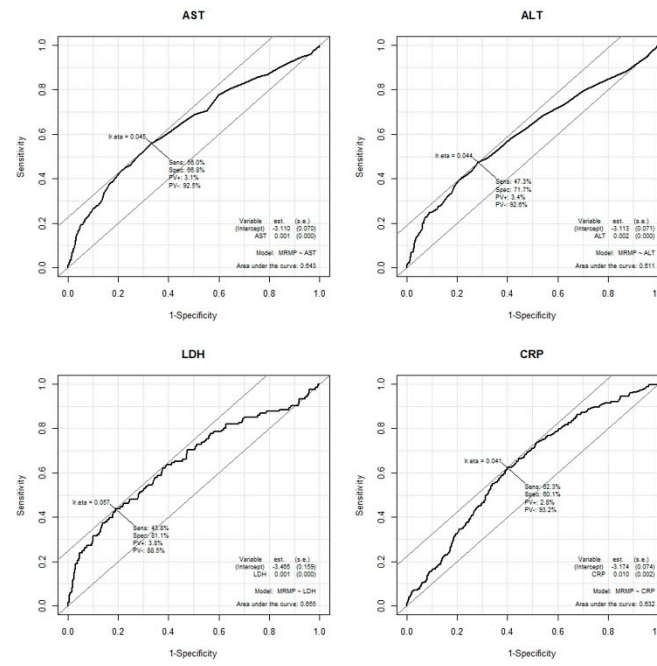

Figure S1: Receiver-operating-curves of the four major serum inflammatory markers for predicting macrolide-refractory *Mycoplasma pneumoniae* pneumonia

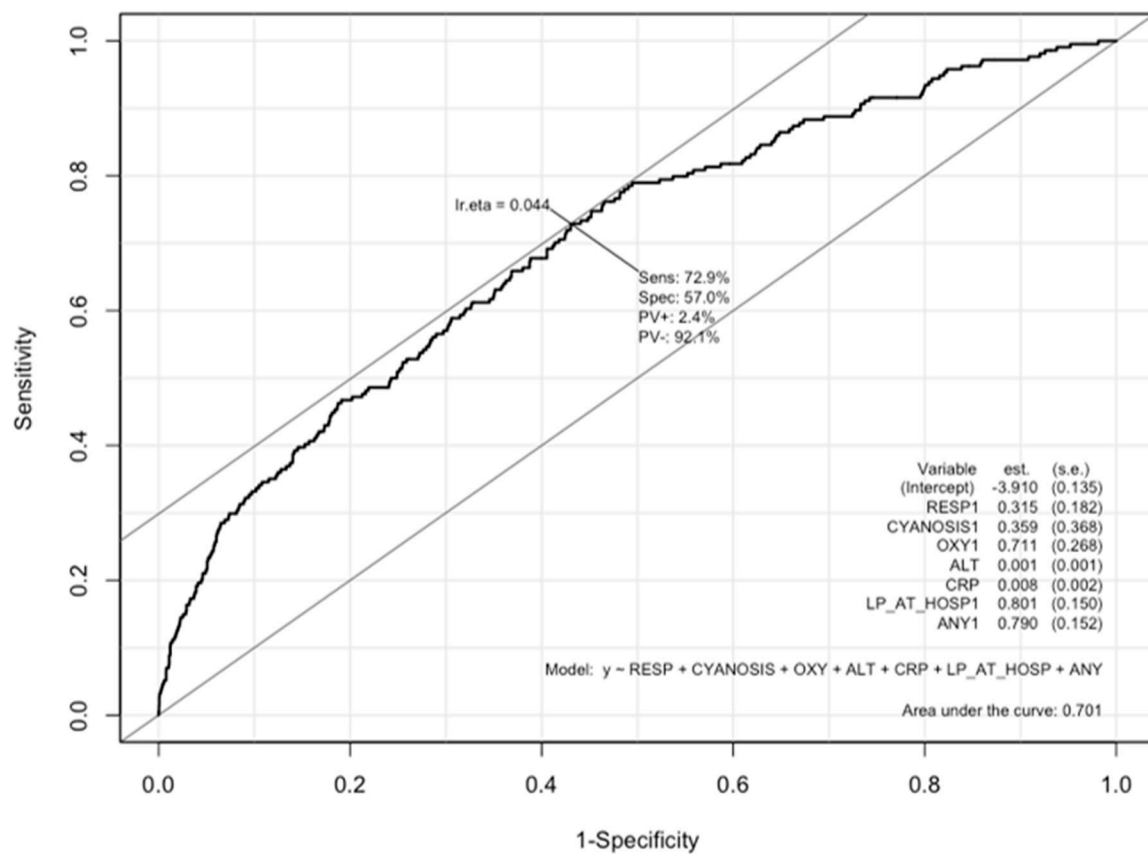

Figure S2: Prediction model of identification to macrolide-refractory *Mycoplasma pneumoniae* pneumonia

**Table S1. Demographics of the two groups classified by the use of macrolide**

|                           | Patients who did not<br>use macrolide | Children with<br><i>Mycoplasma</i><br>pneumonia treated<br>with macrolide | <i>P</i> -value |
|---------------------------|---------------------------------------|---------------------------------------------------------------------------|-----------------|
| Number of the<br>subjects | 2175                                  | 5294                                                                      |                 |
| Male sex                  | 1094 (50.3)                           | 2596 (49)                                                                 | 0.33            |
| Age (months)              | 67.5 (41.9)                           | 66.8 (39.4)                                                               | 0.48            |

All data are presented as either n (%) or mean (standard deviation [SD])

**Table S2. Pre-existing conditions and their relative distribution according to macrolide response**

| Category                   | Total population | MRMP group        | MLMP group     | MSMP group      |
|----------------------------|------------------|-------------------|----------------|-----------------|
| Number of the subject      | 5294             | 240               | 925            | 4129            |
| Any pre-existing condition | 725/4159 (17.4)  | 44/216 (20.4)     | 123/802 (15.3) | 558/3141 (17.8) |
| Allergic disorder          | 645/4162 (15.5)  | 38/217 (17.5)     | 114/802 (14.2) | 493/3143 (15.7) |
| Asthma                     | 334/4811 (6.9)   | 6/236 (2.5) (236) | 42/872 (4.8)   | 286/3703 (7.7)  |
| Controller in use*         | 213 (63.8)       | 1 (0.4)           | 14 (1.6)       | 198 (5.3)       |
| Food allergy               | 141/4993 (2.8)   | 16/240 (6.7)      | 28/923 (3)     | 97/3830 (2.5)   |
| Atopic dermatitis          | 182/4992 (3.6)   | 7/240 (2.9)       | 46/923 (5)     | 129/3829 (3.4)  |
| Atopic sensitization       | 261/4623 (5.6)   | 16/220 (7.2)      | 50/840 (6)     | 195/3562 (5.5)  |
| Respiratory disorder       |                  |                   |                |                 |
| Bronchopulmonary dysplasia | 14/5223 (0.3)    | 0/240 (0)         | 1/923 (0.1)    | 13/4060 (0.3)   |
| Cardiologic disorder       |                  |                   |                |                 |

|                                                |               |             |             |               |
|------------------------------------------------|---------------|-------------|-------------|---------------|
| Congenital heart disease                       | 56/5224 (1.1) | 0/240 (0)   | 3/923 (0.3) | 53/4061 (1.3) |
| Neurologic disorder                            | 47/4996 (0.9) | 5/240 (2.1) | 6/923 (0.7) | 36/3833 (0.9) |
| Musculoskeletal diseases                       | 15/5341 (0.3) | 1/240 (0.4) | 0/923 (0)   | 14/4078 (0.3) |
| Hemato-oncologic disorder                      | 8/5222 (0.2)  | 2/239 (0.8) | 3/923 (0.3) | 3/4060 (0.07) |
| Immune-deficiency or connective tissue disease | 11/5223 (0.2) | 0/240 (0)   | 2/923 (0.2) | 9/4060 (0.2)  |

All data are presented as n (%). \*: The proportion of patients using a controller among asthma patients.

For items with missing responses, the number of actual responses was entered in the column on the right.
